# Supplementary material for: Elderly Patients in a Large Nephrology Unit: Who Are Our Old, Old-Old and Oldest-Old Patients?
Source: PubMed Central journal article supplement (PMC8000250; doi:10.3390/jcm10061168), 2021-03-11
Supplement: jcm-10-01168-s001.pdf [file jcm-10-01168-s001.pdf]

## Supplementary material

Figure S1. Distribution of classes of proteinuria by age groups.

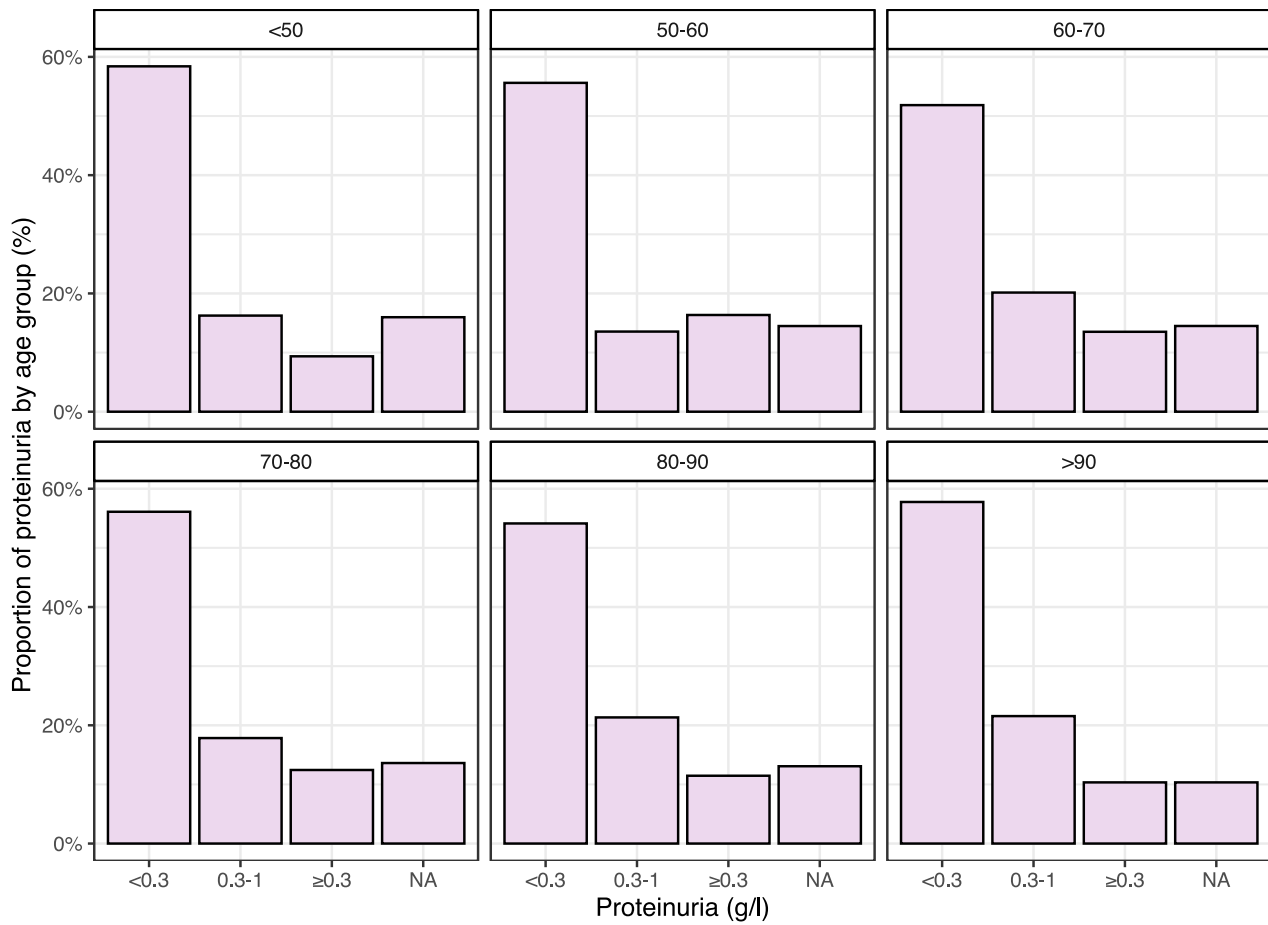

Legend NA: Not available.

Figure S2. Distribution of the CKD-EPI equation stages by age groups.

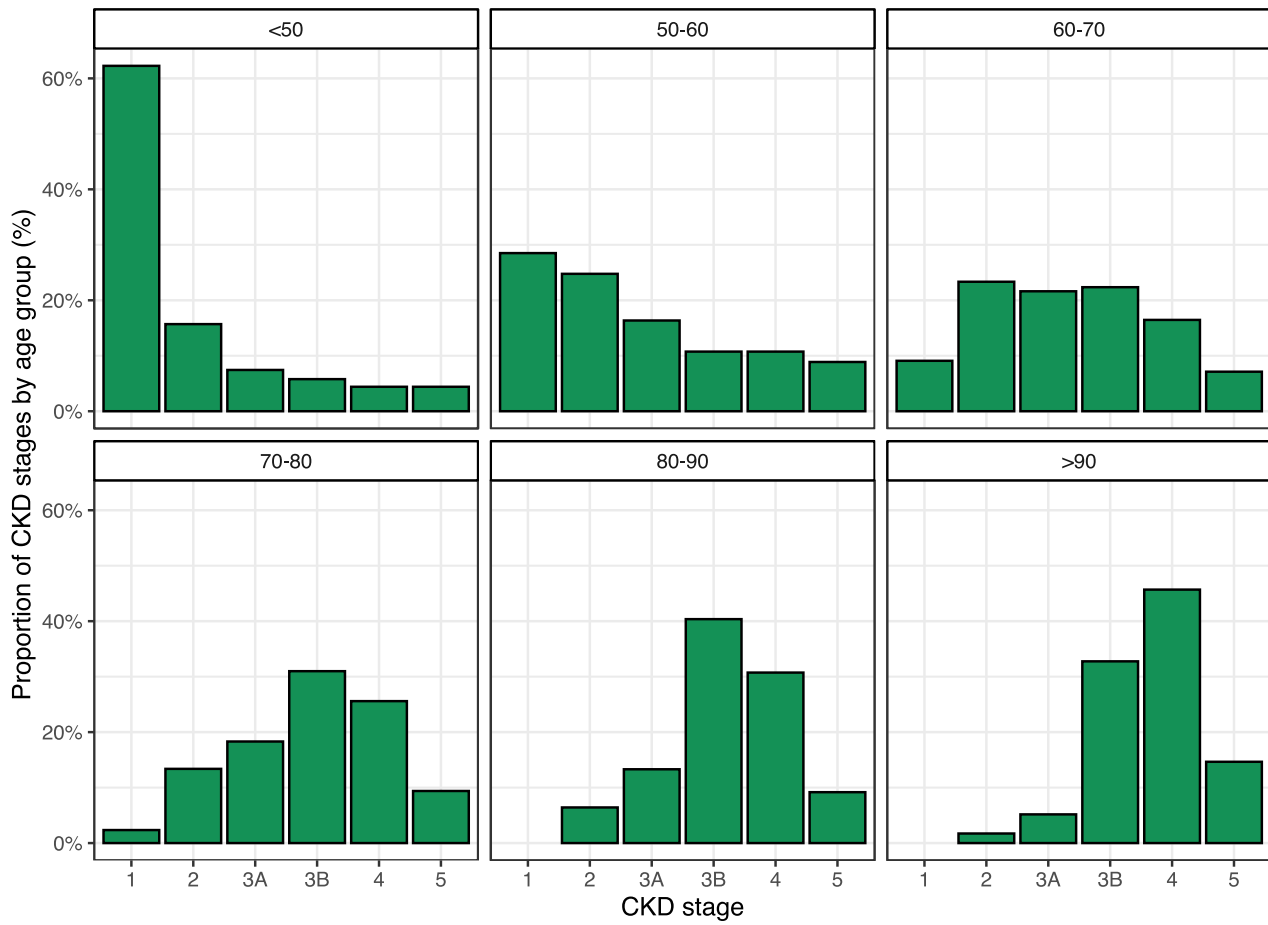

Legend: CKD: chronic kidney disease.

Table S1. Proportion of CKD-stage changes according to eGFR estimation formula by age category.

| Stages                            |               | eGFR estimation formula |                    |                   |                           |        |
|-----------------------------------|---------------|-------------------------|--------------------|-------------------|---------------------------|--------|
|                                   |               | CKD-EPI                 | Lund-Malmö Revised | Full Age Spectrum | Berlin Initiative Study 1 | MDRD   |
| <b>Overall</b>                    |               |                         |                    |                   |                           |        |
| <b>1 to 3A</b>                    | % vs. CKD-EPI | 0                       | -9.7%              | -7.6%             | -0.1%                     | 8.2%   |
|                                   | n             | 918                     | 837                | 853               | 917                       | 1000   |
| <b>3B to 5</b>                    | % vs. CKD-EPI | 0                       | 7.2%               | 5.9%              | 0.1%                      | -8.5%  |
|                                   | n             | 1044                    | 1125               | 1109              | 1045                      | 962    |
| <b>4 to 5</b>                     | % vs. CKD-EPI | 0                       | 19.0%              | 2.4%              | -20.6%                    | -25.1% |
|                                   | N             | 563                     | 695                | 577               | 467                       | 450    |
| <b>&lt;60 years of age</b>        |               |                         |                    |                   |                           |        |
| <b>1 to 3A</b>                    | % vs. CKD-EPI | 0                       | -2.0%              | 3.0%              | 7.5%                      | -0.4%  |
|                                   | n             | 459                     | 450                | 473               | 496                       | 457    |
| <b>3B to 5</b>                    | % vs. CKD-EPI | 0                       | 7.1%               | -13.5%            | -45.7%                    | 1.7%   |
|                                   | n             | 118                     | 127                | 104               | 81                        | 120    |
| <b>4 to 5</b>                     | % vs. CKD-EPI | 0                       | 10.8%              | -19.4%            | -60.9%                    | -2.8%  |
|                                   | n             | 74                      | 83                 | 62                | 46                        | 72     |
| <b>&lt;80 to ≥60 years of age</b> |               |                         |                    |                   |                           |        |
| <b>1 to 3A</b>                    | % vs. CKD-EPI | 0                       | -10.6%             | -8.6%             | 1.6%                      | 9.4%   |
|                                   | n             | 365                     | 330                | 336               | 371                       | 403    |
| <b>3B to 5</b>                    | % vs. CKD-EPI | 0                       | 7.0%               | 5.8%              | -1.3%                     | -8.8%  |
|                                   | n             | 468                     | 503                | 497               | 462                       | 430    |
| <b>4 to 5</b>                     | % vs. CKD-EPI | 0                       | 16.4%              | -8.9%             | -33.2%                    | -22.0% |
|                                   | n             | 245                     | 293                | 225               | 184                       | 201    |
| <b>≥80 years of age</b>           |               |                         |                    |                   |                           |        |
| <b>1 to 3A</b>                    | % vs. CKD-EPI | 0                       | -64.9%             | -113.6%           | -88.0%                    | 32.9%  |
|                                   | n             | 94                      | 57                 | 44                | 50                        | 140    |
| <b>3B to 5</b>                    | % vs. CKD-EPI | 0                       | 7.5%               | 9.8%              | 8.8%                      | -11.2% |
|                                   | n             | 458                     | 495                | 508               | 502                       | 412    |
| <b>4 to 5</b>                     | % vs. CKD-EPI | 0                       | 23.5%              | 15.9%             | -3.0%                     | -37.9% |
|                                   | n             | 244                     | 319                | 290               | 237                       | 177    |
